# Supplementary material for: Preparation and properties of a thin membrane based on sodium alginate grafting acrylonitrile
Source: Royal Society of Chemistry journal article supplement (doi:10.1039/c7ra08532j), 2017-01-01
Supplement: c7ra08532j1.pdf [file c7ra08532j1.pdf]

## Preparation and properties of thin membrane based on Sodium alginate grafting acrylonitrile

Lijun Yang<sup>a</sup>; Jing Guo<sup>a,b1</sup>; JingWu<sup>a</sup>; Yunming Yang<sup>a</sup>; Sen Zhang<sup>a</sup>; Jingxing Song<sup>a</sup> ;  
Qingda An<sup>a</sup>; Yumei Gong<sup>a</sup>

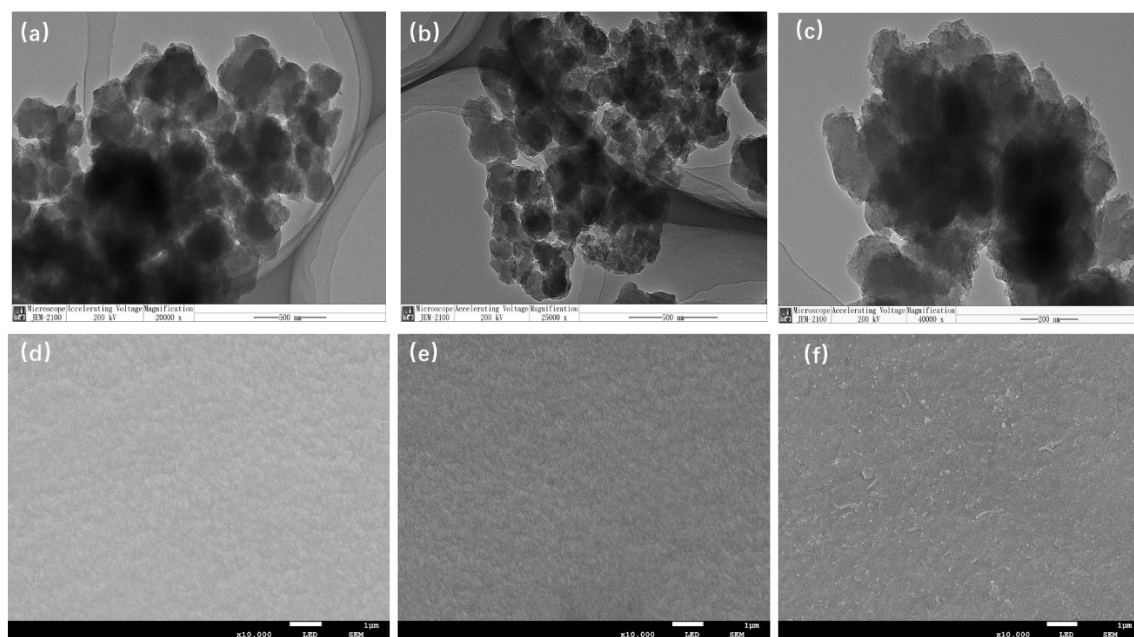

S1. TEM pictures of SA-g-AN copolymers a:SA/AN=1/8; b:SA/AN=1/11; c:SA/AN=1/14 and SEM of SA-g-AN film materials d:SA/AN=1/8; e:SA/AN=1/11; f:SA/AN=1/14

---

<sup>a</sup> Dalian Ploytechnic University, Liaoning 116034, P.R. China

<sup>b1</sup> Liaoning Engineering Technology Research Center of Function Fiber and its Composites, Dalian Ploytechnic university, Dalian 116034, P.R. China
